# Supplementary material
Source: publisher site journal article supplement (https://www.dovepress.com/get_supplementary_file.php?f=406009.docx)
Supplement: Supplementary file 1 [file get_supplementary_file.php]

**Supplementary Table 1**

| **Cell** | **ESO (mg/L)** | **Cisplatin (mg/L)** | **CI** |
| --- | --- | --- | --- |
| SKOV3 | 80 | 2 | 0.931 |
|  |  | 4 | 0.742 |
|  |  | 8 | 1.045 |
|  |  | 16 | 0.834 |
|  | 120 | 2 | 0.787 |
|  |  | 4 | 0.820 |
|  |  | 8 | 1.012 |
|  |  | 16 | 0.802 |
| SKOV3/DDP | 80 | 2 | 1.001 |
|  |  | 4 | 1.025 |
|  |  | 8 | 0.783 |
|  |  | 16 | 0.988 |
|  | 120 | 2 | 0.981 |
|  |  | 4 | 0.968 |
|  |  | 8 | 0.863 |
|  |  | 16 | 0.758 |

**Supplementary Table 1**: ESO and Cisplatin Combination Index (CI) against SKOV3 and SKOV3/DDP Cells. SKOV3 and SKOV3/DDP cells were treated with ESO (80, 120 mg/L) combined with cisplatin (2, 4, 8, 16 mg/L) for 24 h, respectively. Cell viability was measured using CCK8 method. CI ＜ 1 indicates a synergistic effect, CI = 1 indicates an additive effect, while CI ＞ 1 indicates an antagonistic effect.
